# Supplementary material for: The histone modification reader ZCWPW1 is required for meiosis prophase I in male but not in female mice
Source: PubMed Central journal article supplement — Sci Adv. 2019 Aug 14;5(8):eaax1101. doi: 10.1126/sciadv.aax1101 (PMC6693912; doi:10.1126/sciadv.aax1101), 2019-08-14
Supplement: aax1101_SM.pdf [file aax1101_SM.pdf]

## Supplementary Materials for

### **The histone modification reader ZCWPW1 is required for meiosis prophase I in male but not in female mice**

Miao Li, Tao Huang, Meng-Jing Li, Chuan-Xin Zhang, Xiao-Chen Yu, Ying-Ying Yin, Chao Liu, Xin Wang, Hai-Wei Feng, Tuo Zhang, Mo-Fang Liu, Chun-Sheng Han, Gang Lu, Wei Li, Jin-Long Ma, Zi-Jiang Chen, Hong-Bin Liu\*, Kui Liu\*

\*Corresponding author. Email: hongbin\_sduivf@aliyun.com (H.-B.L.); chrisleo99@gmail.com (K.L.)

Published 14 August 2019, *Sci. Adv.* **5**, eaax1101 (2019)  
DOI: 10.1126/sciadv.aax1101

#### **This PDF file includes:**

- Fig. S1. *Zcwpw1* is generally expressed in different tissues.
- Fig. S2. The SC structure appeared normal in *Zcwpw1*<sup>-/-</sup> spermatocytes.
- Fig. S3. Representative images of leptotene and zygotene stages in *Zcwpw1*<sup>-/-</sup> spermatocytes.
- Fig. S4. The SC structure appeared normal in *Zcwpw1*<sup>-/-</sup> oocytes.
- Fig. S5. Protein profiling analysis of PD14 wild-type and *Zcwpw1*<sup>-/-</sup> testes.
- Table S1. List of 94 differentially expressed proteins in PD14 *Zcwpw1*<sup>+/+</sup> and *Zcwpw1*<sup>-/-</sup> testes by HPLC-MS.

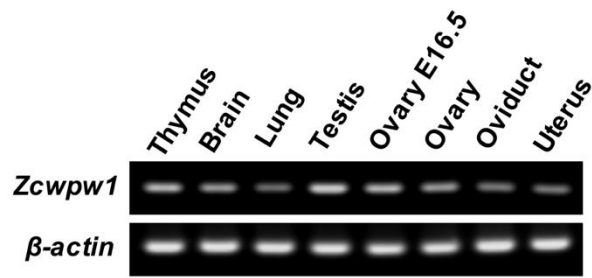

**Fig. S1. *Zcwpw1* is generally expressed in different tissues.** RT-PCR detection of *Zcwpw1* in different tissues indicated that *Zcwpw1* was generally expressed in various tissues, including adult testes and embryonic ovaries.  $\beta$ -actin was used as the control.

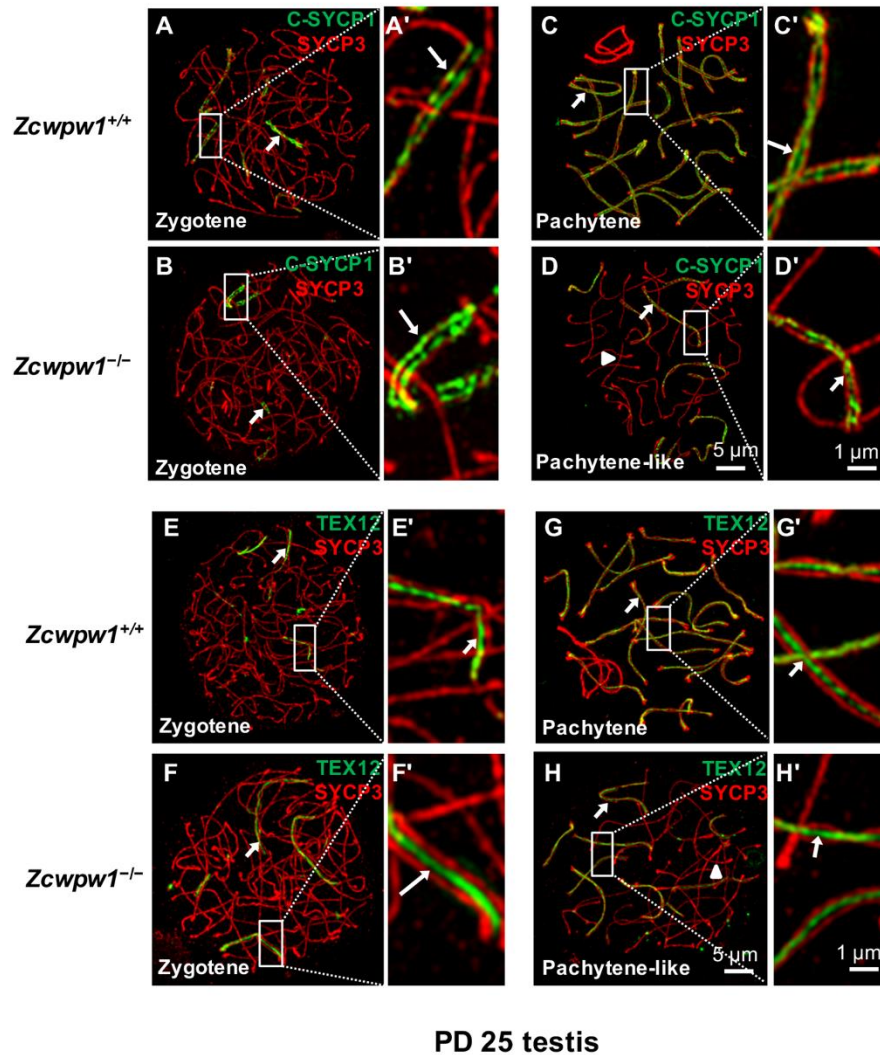

**Fig. S2. The SC structure appeared normal in *Zcwpw1*<sup>-/-</sup> spermatocytes. (A–D).** SIM images of spermatocyte chromosome spreads immunostained for SYCP3 (red) and C-SYCP1 (green) from PD25 testes. Arrows indicated the synapsed region. (A'–D') Magnified views of the synapsed region show that C-SYCP1 (arrows, green signal) was co-localized with SYCP3 (arrowheads, red signal). (E–H). SIM images of spermatocyte chromosome spreads immunostained for SYCP3 (red) and TEX12 (green) from PD25 testes. Arrows indicate the synapsed region, arrowhead indicated the AEs. (E'–H') Magnified views of the synapsed region show that TEX12 localized in the intermediate region between AEs (arrows).

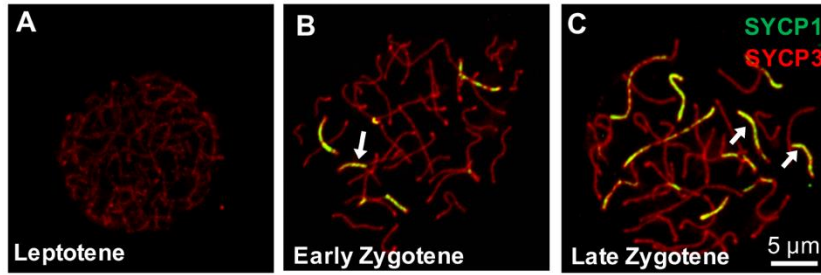

**Fig. S3. Representative images of leptotene and zygotene stages in *Zcwpw1*<sup>-/-</sup> spermatocytes.** (A). Representative image of the leptotene stage in *Zcwpw1*<sup>-/-</sup> spermatocytes. (B). Representative image of the early zygotene stage in *Zcwpw1*<sup>-/-</sup> spermatocytes. (C). Representative image of the late zygotene stage in *Zcwpw1*<sup>-/-</sup> spermatocytes.

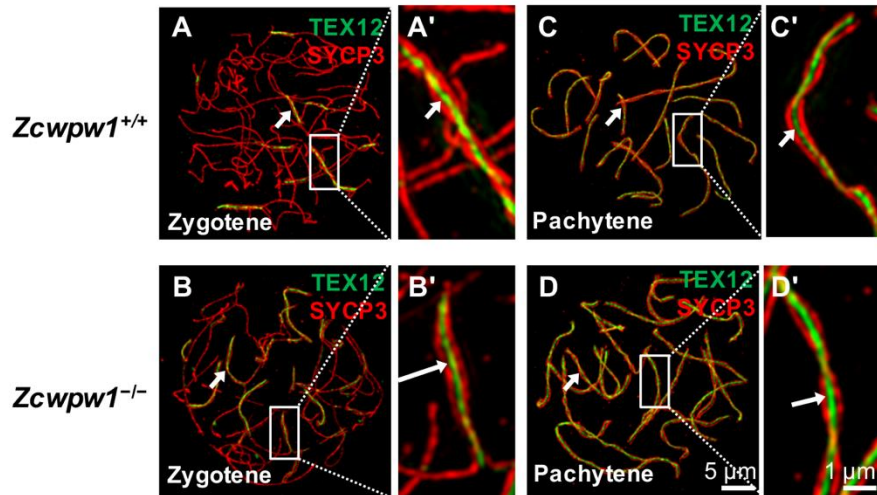

### E17.5 Ovary

**Fig. S4. The SC structure appeared normal in *Zcwpw1*<sup>-/-</sup> oocytes. (A–D).** Chromosome spreads of E17.5 ovaries immunostained for SYCP3 (red) and TEX12 (green) using SIM at the indicated stages. Arrows indicate the synapsed region. (A'–D'). Magnified views of the synapsed region show that TEX12 localized in the central regions of SCs in a continuous pattern (arrows).

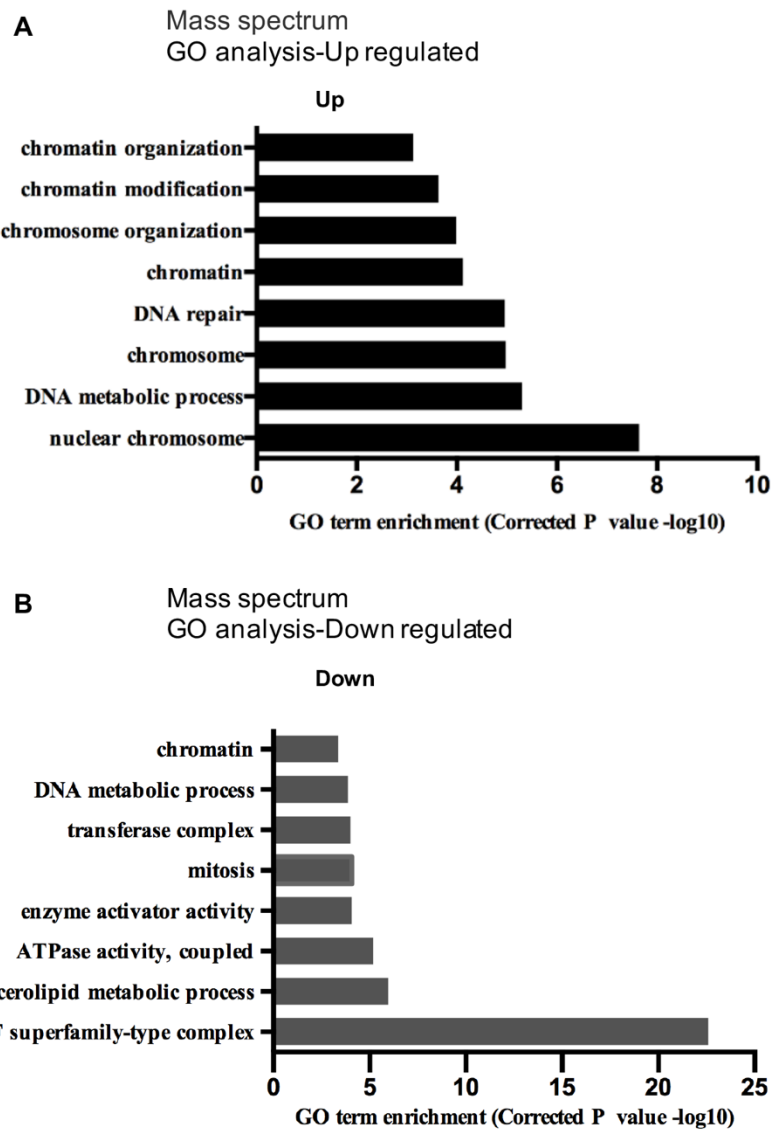

**Fig. S5. Protein profiling analysis of PD14 wild-type and *Zcwpw1*<sup>-/-</sup> testes. (A).** GO term enrichment of up-regulated proteins in *Zcwpw1*<sup>-/-</sup> testes. **(B).** GO term enrichment in down-regulated proteins in *Zcwpw1*<sup>-/-</sup> testes.

**Table S1. List of 94 differentially expressed proteins in PD14 *Zcwpw1*<sup>+/+</sup> and *Zcwpw1*<sup>-/-</sup> testes by HPLC-MS.** List of 94 differentially expressed proteins in PD14 *Zcwpw1*<sup>+/+</sup> and *Zcwpw1*<sup>-/-</sup> testes by HPLC-MS.

| Gene name | Description                                                                      | Fold change | Change trend | P value |
|-----------|----------------------------------------------------------------------------------|-------------|--------------|---------|
| Cnbp      | Cellular nucleic acid-binding protein                                            | 1.58        | UP           | 0.04    |
| Tex101    | Testis-expressed protein 101                                                     | 1.79        | UP           | 0.00    |
| Ythdf2    | YTH domain-containing family protein 2                                           | 1.35        | UP           | 0.02    |
| Pi4kb     | Isoform 2 of Phosphatidylinositol 4-kinase beta                                  | 1.34        | UP           | 0.01    |
| Gm45808   | Uncharacterized protein (Fragment)                                               | 2.02        | UP           | 0.05    |
| Sycp3     | Synaptonemal complex protein 3                                                   | 1.55        | UP           | 0.01    |
| Gm364     | Transmembrane 9 superfamily member                                               | 1.40        | UP           | 0.03    |
| Baz1a     | Bromodomain adjacent to zinc finger domain protein 1A                            | 1.37        | UP           | 0.04    |
| Nfix      | Isoform NFIX2 of Nuclear factor 1 X-type                                         | 1.45        | UP           | 0.05    |
| Hormad1   | Isoform 2 of HORMA domain-containing protein 1                                   | 1.70        | UP           | 0.03    |
| Exosc4    | Exosome complex component RRP41                                                  | 1.67        | UP           | 0.05    |
| Igkv12-41 | Protein Igkv12-41 (Fragment)                                                     | 1.52        | UP           | 0.01    |
| Hist1h2ba | Histone H2B type 1-A                                                             | 1.37        | UP           | 0.00    |
| Itm2b     | Integral membrane protein 2B                                                     | 1.32        | UP           | 0.01    |
| Syce2     | Synaptonemal complex central element protein 2                                   | 1.37        | UP           | 0.02    |
| Ttc23l    | Tetratricopeptide repeat protein 23-like (Fragment)                              | 1.63        | UP           | 0.01    |
| Cyp2d22   | Cytochrome P450 CYP2D22                                                          | 1.33        | UP           | 0.02    |
| Chp1      | Calcineurin B homologous protein 1                                               | 1.31        | UP           | 0.00    |
| Wfdc1     | Putative uncharacterized protein                                                 | 1.84        | UP           | 0.02    |
| Cbwd1     | COBW domain-containing protein 1                                                 | 1.36        | UP           | 0.00    |
| Ggcx      | Vitamin K-dependent gamma-carboxylase                                            | 1.68        | UP           | 0.00    |
| Pam       | Peptidyl-glycine alpha-amidating monooxygenase                                   | 1.52        | UP           | 0.01    |
| Pomgnt1   | Isoform 2 of Protein O-linked-mannose beta-1,2-N-acetylglucosaminyltransferase 1 | 1.42        | UP           | 0.01    |
| Zdhhc12   | Probable palmitoyltransferase ZDHHC12                                            | 1.59        | UP           | 0.04    |

|           |                                                                           |             |              |         |
|-----------|---------------------------------------------------------------------------|-------------|--------------|---------|
| Kcnab1    | Voltage-gated potassium channel subunit beta-1                            | 1.95        | UP           | 0.02    |
| Atp8a1    | Phospholipid-transporting ATPase                                          | 1.46        | UP           | 0.01    |
| Ighg1     | Ig gamma-1 chain C region secreted form (Fragment)                        | 1.49        | UP           | 0.03    |
| Prss50    | Probable threonine protease PRSS50                                        | 1.56        | UP           | 0.05    |
| Rad23a    | Putative uncharacterized protein (Fragment)                               | 1.35        | UP           | 0.04    |
| Rlf       | Rearranged L-myc fusion sequence                                          | 1.39        | UP           | 0.03    |
| Stard9    | StAR-related lipid transfer protein 9                                     | 1.57        | UP           | 0.00    |
| Bckdk     | [3-methyl-2-oxobutanoate dehydrogenase [lipoamide]] kinase, mitochondrial | 1.48        | UP           | 0.04    |
| Pdzd11    | PDZ domain-containing protein 11                                          | 1.61        | UP           | 0.03    |
| Rab32     | Ras-related protein Rab-32                                                | 1.53        | UP           | 0.04    |
| Rbms1     | RNA-binding motif, single-stranded-interacting protein 1                  | 1.41        | UP           | 0.01    |
| Brms11    | Breast cancer metastasis-suppressor 1-like protein                        | 1.30        | UP           | 0.04    |
| Figl1     | Fidgetin-like protein 1                                                   | 1.42        | UP           | 0.03    |
| Rab6a     | Ras-related protein Rab-6A                                                | 1.45        | UP           | 0.00    |
| Uchl5     | Isoform 2 of Ubiquitin carboxyl-terminal hydrolase isozyme L5             | 1.74        | UP           | 0.04    |
| Gmeb2     | Glucocorticoid modulatory element-binding protein 2                       | 1.38        | UP           | 0.03    |
| Tmed3     | Transmembrane emp24 domain-containing protein 3                           | 1.34        | UP           | 0.02    |
| Gene name | Description                                                               | Fold change | Change trend | P value |
| Tyw1      | S-adenosyl-L-methionine-dependent tRNA 4-demethylwyosine synthase         | -1.35       | DOWN         | 0.04    |
| Tmem168   | Transmembrane protein 168                                                 | -1.34       | DOWN         | 0.04    |
| Itga7     | Integrin alpha 7                                                          | -1.56       | DOWN         | 0.01    |
| Elov12    | Elongation of very long chain fatty acids protein 2                       | -1.39       | DOWN         | 0.03    |
| Ube2d4    | Ubiquitin-conjugating enzyme E2D 4                                        | -1.72       | DOWN         | 0.01    |
| Eif2s2    | Eukaryotic translation initiation factor 2 subunit 2 (Fragment)           | -1.34       | DOWN         | 0.05    |
| Ncapg2    | Condensin-2 complex subunit G2                                            | -1.60       | DOWN         | 0.04    |
| Apoc3     | Apolipoprotein C-III                                                      | -1.43       | DOWN         | 0.03    |
| Timm29    | Mitochondrial import inner membrane translocase subunit Tim29             | -1.36       | DOWN         | 0.03    |
| Thns11    | Threonine synthase-like 1                                                 | -1.38       | DOWN         | 0.01    |
| Ocr1      | Isoform 2 of Inositol polyphosphate 5-phosphatase OCRL-1                  | -1.59       | DOWN         | 0.00    |
| Chd5      | Chromodomain-helicase-DNA-binding protein 5                               | -1.32       | DOWN         | 0.00    |
| Bet11     | BET1-like protein                                                         | -2.02       | DOWN         | 0.02    |



|          |                                                                       |       |      |      |
|----------|-----------------------------------------------------------------------|-------|------|------|
| Cdc27    | Cell division cycle protein 27 homolog                                | -1.34 | DOWN | 0.02 |
| Tusc3    | Tumor suppressor candidate 3 (Fragment)                               | -1.36 | DOWN | 0.03 |
| Rb1cc1   | RB1-inducible coiled-coil protein 1 (Fragment)                        | -2.13 | DOWN | 0.01 |
| Ube2c    | Ubiquitin-conjugating enzyme E2 C                                     | -1.37 | DOWN | 0.05 |
| Thap11   | THAP domain-containing protein 11                                     | -1.57 | DOWN | 0.01 |
| Slc7a5   | Large neutral amino acids transporter small subunit 1                 | -1.30 | DOWN | 0.03 |
| Rfc5     | Replication factor C subunit 5                                        | -1.31 | DOWN | 0.03 |
| Ndrp1    | Protein NDRG1                                                         | -1.36 | DOWN | 0.00 |
| Serinc3  | Serine incorporator 3                                                 | -1.65 | DOWN | 0.02 |
| Gtf2h3   | General transcription factor IIH subunit 3                            | -2.01 | DOWN | 0.00 |
| Znf609   | Zinc finger protein 609                                               | -1.48 | DOWN | 0.04 |
| Tra2a    | Transformer-2 protein homolog alpha                                   | -1.47 | DOWN | 0.03 |
| Clcn5    | Chloride channel protein                                              | -1.32 | DOWN | 0.02 |
| Aard     | Alanine and arginine-rich domain-containing protein                   | -1.35 | DOWN | 0.01 |
| Washc5   | WASH complex subunit 5                                                | -1.58 | DOWN | 0.01 |
| Sipa111  | Isoform 2 of Signal-induced proliferation-associated 1-like protein 1 | -1.51 | DOWN | 0.05 |
| Scai     | Protein SCAI                                                          | -1.32 | DOWN | 0.04 |
| Fam76a   | Protein FAM76A                                                        | -1.58 | DOWN | 0.00 |
| Kctd2    | BTB/POZ domain-containing protein KCTD2                               | -1.51 | DOWN | 0.01 |
| Gtf2h2   | General transcription factor II H, polypeptide 2, isoform CRA_b       | -1.36 | DOWN | 0.04 |
| Bola1    | BolA-like protein 1                                                   | -1.44 | DOWN | 0.01 |
| Epdr1    | Mammalian ependymin-related protein 1                                 | -1.31 | DOWN | 0.02 |
| Tubb2a   | Tubulin beta-2A chain                                                 | -1.31 | DOWN | 0.03 |
| Afp      | Alpha-fetoprotein                                                     | -1.51 | DOWN | 0.03 |
| Actr5    | Actin-related protein 5                                               | -1.52 | DOWN | 0.03 |
| Egflam   | Isoform 2 of Pikachurin                                               | -1.99 | DOWN | 0.00 |
| Actr8    | Actin-related protein 8                                               | -1.55 | DOWN | 0.01 |
| Tbc1d10a | TBC1 domain family member 10A                                         | -1.41 | DOWN | 0.00 |
| Plekhg5  | Pleckstrin homology domain-containing family G member 5               | -1.36 | DOWN | 0.01 |
| Apoc2    | Apolipoprotein C-II                                                   | -1.54 | DOWN | 0.04 |
| Serpinc1 | Antithrombin-III                                                      | -1.59 | DOWN | 0.01 |
| Lgals7   | Galectin                                                              | -1.59 | DOWN | 0.01 |
| Enpp4    | Isoform 2 of Bis(5'-adenosyl)-triphosphatase enpp4                    | -1.51 | DOWN | 0.00 |
| Hexa     | Beta-hexosaminidase subunit alpha                                     | -1.60 | DOWN | 0.04 |
| Nelfcd   | Negative elongation factor D                                          | -1.34 | DOWN | 0.02 |
| Nrde2    | Protein NRDE2 homolog                                                 | -2.00 | DOWN | 0.03 |
| Exosc3   | Exosome complex component RRP40                                       | -1.43 | DOWN | 0.03 |
| Dtd1     | D-tyrosyl-tRNA(Tyr) deacylase 1                                       | -1.42 | DOWN | 0.00 |
| Bap18    | Isoform 2 of Chromatin complexes subunit BAP18                        | -1.43 | DOWN | 0.03 |
| Zcwpw1   | Zinc finger CW-type PWWP domain protein 1                             | -1.68 | DOWN | 0.00 |
